# Supplementary material
Source: publisher site journal article supplement (https://www.dovepress.com/article/365371)
Supplement: Supplementary file 1 [file get_supplementary_file.php]

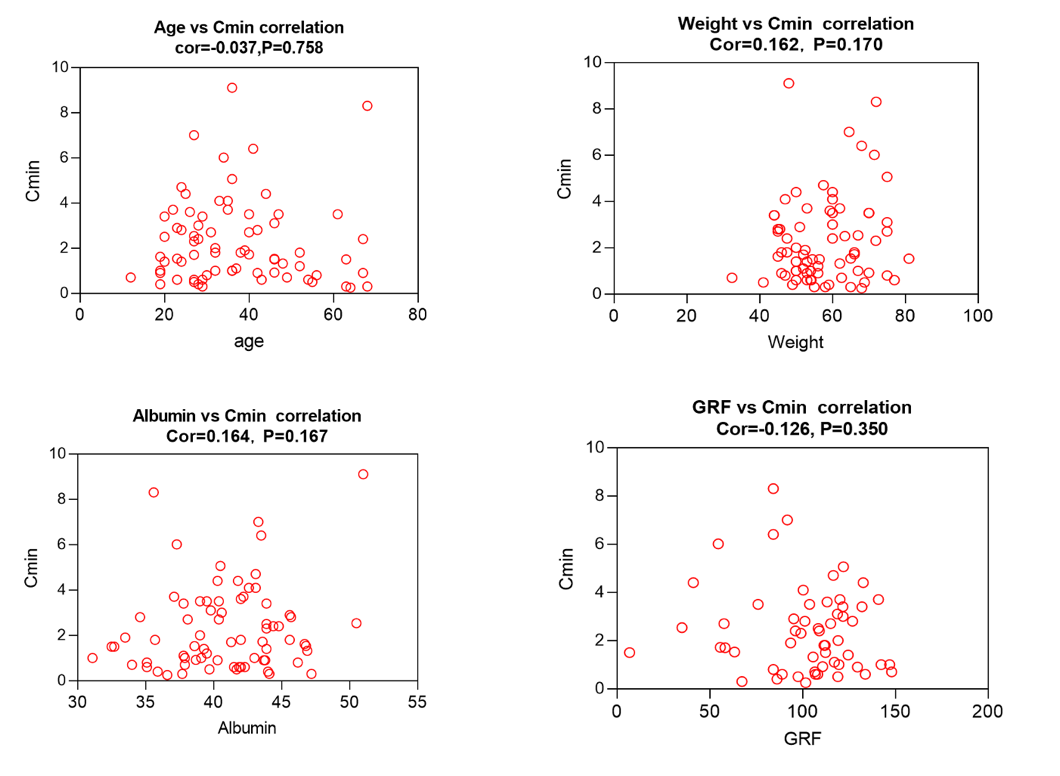


Supplementary Figure 1. Correlation between Serum trough concentration (Cmin) and age, weight, albumin, eGFR
